# Supplementary material for: Map7D2 and Map7D1 facilitate microtubule stabilization through distinct mechanisms in neuronal cells
Source: Life Sci Alliance. 2022 Apr 25;5(8):e202201390. doi: 10.26508/lsa.202201390 (PMC9039348; doi:10.26508/lsa.202201390)
Supplement: Supplementary file 5 [file LSA-2022-01390_SdataF4.2.xlsx]

## Sheet: EB1 (relative)
Control	siMap7d1	siMap7d2
1.50335	0.754641	0.782632
1.14099	0.877372	0.780464
1.77048	1.20705	1.65828
1.32474	0.917992	1.26899
1.09951	1.29895	0.887543
1.3246	1.05377	1.04128
1.19617	1.73387	1.235
1.34463	1.28263	1.4272
1.00863	1.83941	1.31551
0.953631	1.30556	1.17128
0.760019	0.870213	0.757456
0.691562	0.708847	1.23048
0.479871	0.82932	1.62338
1.33869	0.943158	1.12278
0.735858	0.837451	1.50148
0.650731	0.762978	1.51074
0.518742	1.59499	1.09237
1.24213	0.66405	1.0536
0.99137	0.808205	1.14384
1.24504	1.41967	1.79174
0.733071	1.44231	1.52738
0.828059	1.99005	1.04282
0.616778	1.16806	1.43559
0.568609	1.5474	1.08301
1.29721	1.25464	1.28774
0.659137	2.92902	1.63299
0.914973	1.5892	1.01787
1.04399	2.02466	1.05796
1.26324	1.2851	1.20939
0.453751	1.59297	1.63006
1.43193	2.00908	1.6469	0.95
1.25869	1.57875	1.48501	Quartile-3
1	1.26863	1.21994	Median
0.70194	0.872003	1.05469	Quartile-1
0.497363	0.729454	0.78144	0.05

## Sheet: Kif5b_ratio
Control	siMap7d1	siMap7d2
0.189615	0.0944265	0.0284463
0.136809	0.0171805	0.0375182
0.0961369	0.179653	0.422189
0.0790787	0.0303765	0.0136955
0.0749122	0.0613333	0.106311
0.0956047	0.0955899	0.0640209
0.0703135	0.0679126	0.0870896
0.0135527	0.120012	0.0170652
0.0709043	0.137171	0.188717
0.0138388	0.178913	0.0721975
0.189469	0.0559998	0.191027
0.0308062	0.0681323	0.101931
0.0110158	0.203037	0.0959137
0.00137125	0.120932	0.0644408
0.318604	0.0755303	0.169698
0.0349452	0.0314453	0.0357803
0.00514301	0.0151818	0.249606
0.347114	0.00233779	0.0140606
0.151612	0.0248271	0.0862005
0.174579	0.0159546	0.0433017
0.0769793	0.0521644	0.0343991
0.587923	0.0593489	0.130237
0.0345873	0.00460702	0.140774
0.0702047	0.0747118	0.296396
0.118435	0.0680694	0.0236939
0.0493464	0.234975	0.209077
0.0706313	0.149849	0.0335516
0.019146	0.0828172	0.0359122
0.0219415	0.201628	0.00776961
0.0404101	0.0713262	0.048383
0.334285	0.202403	0.275341	0.95
0.132216	0.120702	0.13814	Quartile-3
0.0707678	0.0697293	0.0683192	Median
0.0317515	0.0366251	0.0347444	Quartile-1
0.00778575	0.00936568	0.0138598	0.05
