# Supplementary material for: Map7D2 and Map7D1 facilitate microtubule stabilization through distinct mechanisms in neuronal cells
Source: Life Sci Alliance. 2022 Apr 25;5(8):e202201390. doi: 10.26508/lsa.202201390 (PMC9039348; doi:10.26508/lsa.202201390)
Supplement: Supplementary file 7 [file LSA-2022-01390_SdataF5.2.xlsx]

## Sheet: Control_siMap7d1
Control	Acetylated_normalized	Map7D2_normalized	Tubulin_normalized		siMap7d1	Acetylated_normalized	Map7D2_normalized	Tubulin_normalized
	0.756235	0.792995	0.765803			0.374406	1.44618	0.889606
	0.473055	0.733485	0.414659			0.321927	1.11304	0.680311
	0.484338	0.831577	0.467587			0.265068	1.26353	0.569009
	0.75386	0.441629	0.17038			0.150089	1.36575	1.11695
	0.783922	0.385251	0.278052			0.324525	1.15105	0.457203
	0.720606	1.32958	1.05464			0.478771	1.16045	0.547031
	0.664044	0.857916	0.61851			0.580389	1.99274	0.676076
	0.72454	1.35948	1.06624			0.273308	1.60364	0.582418
	0.826158	0.603075	0.605001			0.329276	1.49673	0.943744
	1.24555	0.928815	7.70057			0.0860303	0.943622	0.421313
	0.499332	1.00968	2.2963			0.143334	1.49359	0.636354
	0.993988	0.888952	0.730719			0.340336	1.3387	0.800988
	1.06517	0.928104	0.977619			0.20769	1.25271	0.47656
	0.299213	0.62258	1.33259			0.397565	1.32773	0.737574
	0.463851	0.743166	0.628995			0.299436	2.8209	1.17794
	0.221422	0.644077	0.393891			0.248812	2.16543	1.91421
	0.662931	1.26694	1.60984			0.350505	2.5803	1.10868
	0.872625	0.682232	0.976812			0.190766	1.62343	0.957657
	0.892221	0.764522	0.736264			0.120992	1.21056	0.52838
	0.811312	0.546128	0.448836			0.239682	1.89792	1.33501
	0.499258	0.756264	1.07622			0.139623	1.31592	0.472729
	0.977064	0.793992	1.52203			0.258982	0.854214	0.561246
	0.375297	0.697751	0.805021			0.0859561	0.709425	0.395504
	0.896749	0.712272	0.819236			0.10726	1.33343	0.617401
	0.562277	0.631407	0.566489			0.196704	0.971669	0.347616
	0.541271	0.614892	0.429076			0.0511431	0.659169	0.27281
	0.866835	0.788867	0.839903			0.34761	1.74203	1.1108
	0.628563	1.08172	1.29176			0.138732	1.70245	1.03196
	1.57534	1.37229	1.85472			0.0950119	1.09567	1.03992
	1.16746	0.952306	2.05666			0.188242	1.07603	0.665591
	1.12893	0.927961	1.20798			0.308937	1.44647	0.443391
	1.70724	1.03232	1.80623			0.214296	0.900199	0.459623
	1.54699	1.35792	1.52223			0.0850653	1.55666	1.08882
	2.55909	1.93423	3.52314			0.101024	1.43451	0.74201
	1.40684	0.929812	0.771348			0.208952	1.02463	0.78274
	1.20153	0.954157	0.91108			0.0913747	0.881834	0.459825
	1.81094	1.39052	0.980744			0.46823	2.01466	1.20819
	1.27205	0.934368	1.60853			0.279691	1.87329	0.773163
	0.622922	0.627705	0.84565			0.441657	2.24445	0.946366
	0.670205	1.13682	1.21665			0.248515	0.980923	0.385926
	1.38101	1.18195	0.704809			0.167087	0.952022	0.489263
	0.48174	0.879556	0.785866			0.0414935	0.608485	0.792015
	1.30582	1.26751	0.783043			0.468898	1.4002	2.30245
	0.258536	0.917853	0.687166			0.28652	1.38554	0.92721
	1.45331	0.888383	0.516383			0.325713	1.86987	1.49975
	1.65744	1.92355	1.78687			0.459249	1.35735	1.02551
	1.04097	0.800114	0.579897			0.300104	1.53545	1.1853
	1.71645	1.10692	1.1606			0.36253	0.824174	0.684847
	1.28288	1.00982	0.584736			0.0752672	1.00441	1.13812
	0.711253	0.981777	1.24539			0.151574	0.227648	0.530598
	0.447743	1.22808	0.811675			0.0600505	0.639522	0.158685
	0.386654	0.816344	0.968041			0.145932	1.00626	0.18883
	1.18527	1.05054	1.26676			0.29038	1.06449	0.27412
	0.390365	0.780752	0.610545			0.241612	1.02719	0.743422
	0.544908	0.620444	0.923783			0.237901	0.908457	0.501764
	0.899792	0.615319	0.486138			0.0864757	0.906891	0.200625
	1.46934	0.96512	0.886985			0.234189	1.2752	0.45559
	1.17236	1.13781	1.02319			0.0918201	0.808798	0.292267
	0.698634	0.809368	0.733441			0.507497	1.63468	0.57032
	1.22491	0.809368	0.904123			0.111342	0.655609	0.596129
	0.611119	0.796697	0.805323			0.161075	1.1092	0.450045
	1.06042	0.799829	0.715798			0.165974	0.857062	0.251638
	2.2356	1.45786	1.3212			0.249332	1.24188	0.528481
	3.71452	0.788297	1.03629			0.23753	0.821754	0.226737
	1.04624	0.810507	0.718722			0.217191	1.01353	0.560843
	0.817696	0.850797	1.01583			0.279765	0.97779	0.67043
	0.590929	0.922267	2.9502			0.149273	0.87258	0.294082
	2.03422	1.84937	2.98064			0.715632	2.38482	1.5559
	1.74028	2.13383	2.25376			0.537411	1.32346	1.1109
	2.15469	2.25854	3.11917			0.139178	0.721669	0.246497
	0.646229	1.14863	0.559028			0.422209	1.34311	0.743321
	2.2402	1.334	2.8399			0.504899	1.27435	0.810868
	0.655953	1.11461	0.698659			0.590336	1.48178	0.876096
	1.39838	1.17483	1.55127			0.477954	1.30794	0.943139
	0.767666	1.25997	1.36304			0.786149	1.8797	1.18681
	0.344863	0.301965	0.384615			0.397788	0.868166	0.993346
	1.47588	1.40903	1.91209			0.55723	1.44775	1.08348
	1.31072	1.35905	1.37625			0.216226	1.2705	0.845146
	1.16107	0.869732	0.945055			0.224317	2.001	1.04627
	1.48842	1.05083	0.937595			0.234857	1.11432	0.496723
	0.5841	0.998007	0.708942			0.472016	1.16743	0.612763
	1.2238	0.438924	0.325436			0.156102	1.22153	0.717109
	0.212069	0.166572	0.115334			0.191137	1.03218	0.607118
	0.524273	0.848804	0.516181			0.133017	0.925683	0.646638
	0.77212	0.844818	0.840508			0.285629	1.2285	0.815304
	0.874035	1.13069	0.84071			0.169685	1.22238	0.775381
	0.334694	0.666572	0.626575			0.272788	1.31065	1.21676
	0.892592	1.53232	0.73092			0.195145	1.92426	1.10757
	0.952791	1.27121	0.819034			0.246511	1.61204	0.308096
	0.738346	0.865461	0.476359			0.33514	1.17696	0.283295
	1.06695	0.785165	0.620627			0.193587	1.18565	0.745942
	0.491315	1.44974	1.1723			0.0849911	0.910023	0.578183
	0.47981	0.901481	0.76671			0.639697	1.7174	0.538663
	0.959843	1.3498	1.11433			0.129231	0.887813	0.542797
	3.43795	2.36575	5.66821			0.362159	1.44277	0.598952
	1.03986	2.30794	3.26878			0.303147	1.293	0.808247
	1.00527	0.914151	0.787983			0.3341	0.786589	0.680109
	1.27806	1.07019	0.966226			0.347164	1.70074	0.537252
	3.04298	1.35094	1.44934			0.20628	1.3619	0.608731
	0.914341	1.52121	0.953524			0.193512	1.1969	0.65682
	2.7111	1.73576	1.45751			0.249332	1.3582	0.184797
	0.67889	0.646925	0.810162			0.270264	0.840831	0.365158
	1.18171	1	1.42172			0.157067	0.867597	0.224317
	0.948337	0.915006	0.966731			0.829053	1.31222	0.9506
	1.89749	1.19747	1.15233			0.446704	1.95387	0.975199
	0.785333	0.62799	0.948886			0.222981	1.03303	0.817119
	1.80619	1.6996	1.4816			0.186312	0.889095	0.502067
	1.22476	1.2762	0.926404			0.091152	0.800399	0.835871
	1.58878	1.48405	1.68011			0.205686	0.924402	0.517794
	1.21459	1.30979	1.18187			0.177331	0.750427	0.803004
	2.27598	0.878417	5.75502			0.161149	1.03331	1.09194
	1.42614	0.883542	5.1734			0.103103	1.04527	0.600766
	1.17607	1.43522	1.10303			0.148976	1.73676	0.904023
	1.21756	1.34211	0.99012			0.366686	1.07702	1.08438
	1.22907	1.15305	0.830527			0.287559	0.841686	0.766811
	0.650609	0.947181	0.747152			0.44611	1.39678	1.68727
	1.4738	1.11461	0.961488			0.302034	0.848662	0.630104
	0.559679	1.33927	1.24498			0.17837	0.834425	0.571731
	1.45227	1.42725	1.31898			0.104884	1.06449	0.935679
	0.718898	1.14023	1.11362			0.225802	1.28844	0.818127
	1.09271	1.17084	0.807239			0.232779	1.39265	1.82428
	1.57156	2.15703	1.5922			0.144225	1.05239	0.419599
	1.58314	2.19305	2.5434			0.448412	1.08485	0.773768
	1.40061	1.35179	1.4943			0.172357	1.21071	0.89747
	1.2304	1.06065	1.32191			0.509872	0.952306	0.380986
	0.986565	0.941344	1.34862			0.5553	1.11219	1.17693
	0.4663	0.837272	0.832846			0.578014	1.01979	0.782337
	0.82549	0.875997	0.977115			0.291865	1.45103	1.33844
	0.885466	0.897779	1.36012			0.112901	1.13098	1.59421
	1.06027	1.03303	1.54118			0.108002	0.93508	0.618611
	0.567622	1.04869	1.24609			1.05307	1.12187	0.882246
	0.798694	0.730068	0.584938			0.145042	1.4449	1.70158
	2.17844	0.647637	1.08247			0.180819	1.02392	0.979232
	0.712144	1.125	0.869644			0.167904	1.25171	1.28461
	0.729958	1.08428	1.0865			0.110971	1.11987	0.598447
	0.451455	0.703303	0.621333			0.0501781	1.13155	0.872971
	0.833655	0.727221	0.62718			0.26106	1.30011	1.02329
	0.885392	0.942768	0.775078			0.233818	1.19917	1.05948
	0.797506	0.783599	1.11533			0.125891	0.988753	1.20909
	0.305819	0.707859	0.580502			0.28704	1.07332	0.921968
	1.18921	0.721669	0.976207			0.3966	0.859339	0.72104
	1.33462	1.28246	1.66035			0.215484	1.97551	1.65964
	0.553073	0.811219	0.918943			0.423694	2.93907	2.42827
	0.831428	1.11204	0.59008			0.451455	1.96469	0.728602
	1.62426	1.15703	0.989616			0.580092	3.97039	1.87398
	1.71311	1.12472	0.869947			0.323857	1.69974	1.73032
	0.773159	0.968679	0.656316			0.671393	1.86076	1.31152
	2.42585	1.47181	2.14225			0.726841	3.15447	1.36919
	0.858893	1.11233	1.39581			0.425624	1.7947	1.13227
	1.90068	1.20501	2.61801			0.466672	4.19134	2.20819
	0.42451	1.0998	0.710455			0.567919	2.02662	0.641496
	1.42844	0.918423	1			0.570368	1.79428	0.731122
	1	1.1754	1.99758			0.254231	1.18935	0.48765
	0.937129	0.834425	0.879827			0.284442	1.76367	0.727795
	0.942473	0.723804	1.19679			0.793572	2.55225	1.99284
	1.86914	0.993451	2.02591			0.128563	1.05011	0.216252
	1.68594	1.13724	2.15969			0.21734	1.55752	0.882649
	1.4735	0.917853	2.01512			0.296541	2.7137	1.50892
	1.34212	1.11361	1.64029			1.04365	4.48491	4.38885
	0.567028	0.854499	0.935377			0.38554	1.29086	0.637766
	0.756903	0.827876	0.898074			0.480404	4.18964	2.26313
	1.23508	1.03773	1.76873			0.522491	1.39109	0.914508
	1.38406	1.34838	1.6418			0.284813	1.82973	1.48281
	0.706428	0.713126	0.883053			0.580983	3.47765	3.06765
	0.932007	0.827591	1.38603			0.2572	2.01595	0.430386
	2.15736	2.20829	2.24771			0.202049	1.00327	0.47162
	1.13717	1.88055	1.21726			0.548174	2.36233	1.23652
	1.40729	2.23875	1.32745			0.653726	1.50185	0.800484
	0.733299	1.5457	1.23833			0.226247	1.91885	0.712471
	0.848426	1.50242	0.916927			0.203162	2.29784	0.538562
	1.4784	2.2406	1.66368			0.215781	1.07531	0.51235
	1.47328	2.01637	1.32181			0.16731	0.871868	0.442383
	1.79112	1.76765	3.247			0.419611	1.19761	0.527573
	1.23671	1.16259	0.895756			0.110303	1.41088	0.687973
	1.71207	0.761817	0.437645			0.0901128	0.996441	0.306987
	0.64905	1.06193	0.563464			0.161372	2.75925	0.63081
	1.18705	1.70103	1.91904			0.238643	1.43522	0.465974
	0.878637	1.25456	1.43402			0.401277	3.25171	1.93134
	1.41033	0.892084	0.749269			0.288821	2.15433	0.952011
	1.37255	0.992597	0.92348			0.119284	1.50897	1.09759
	2.087	1.49843	3.12632			0.0786075	1.73818	1.02238
	2.15469	2.35336	2.3088			0.375223	1.31335	0.746849
	1.89601	1.61318	2.24125			0.054038	0.997295	0.31606
	0.814504	1.69917	1.42343			0.176514	1.67825	0.972074
	1.92369	2.1986	2.97762			0.0745992	1.17867	0.545317
	1.52561	1.23021	1.22785			0.341597	1.85165	0.686259
	1.06532	0.833713	0.694324			0.501262	1.9412	0.966025
	1.49659	2.03018	1.73011			0.111416	2.25028	0.750378
	0.470977	0.786304	1.25325			0.099614	0.807659	0.672749
	0.689207	0.701167	1.46708			0.229142	1.07987	0.828309
	1.65477	1.83186	2.47374			0.0898901	1.22024	0.527775
	0.67785	0.865461	1.23904			0.230849	1.68408	1.09628
	0.687945	0.890233	1.17804			0.184308	1.69106	0.930437
0.95	2.1658	2.14311	2.97883			0.0231591	1.00897	0.19014
Quartile-3	1.42844	1.32958	1.46708			0.0726692	2.17113	1.14477
Median	1	1	1			0.62255	1.9123	0.497631
Quartile-1	0.706428	0.811219	0.771348			0.148679	0.983058	0.728098
0.05	0.410852	0.621726	0.460087			0.0883314	0.831577	0.831636
						0.38658	0.864465	0.834157
						0.1394	1.34838	0.617703
						0.870917	1.31962	0.819942
						0.369804	1.89052	0.947979
						0.304929	1.75883	0.701583
						0.392221	2.46555	1.3583
						0.240721	1.40618	1.03387
						0.219789	0.707005	0.693719
						0.280656	1.08927	0.31606
						0.44329	1.82503	0.722855
						0.154394	1.21099	0.583527
						0.602138	1.06706	0.339651
						0.213702	1.74829	0.572638
						0.335288	1.07062	0.377861
						0.274421	1.20473	0.657324
						0.176737	0.982631	0.43462
						0.612678	1.25783	0.327856
						0.174807	0.98078	0.430689
						0.242429	1.5336	0.806735
						0.218527	2.06022	0.505696
						0.350802	1.58556	0.890715
						0.295947	2.11133	0.750277
						0.108299	0.92668	0.519306
						0.121363	1.07104	0.380482
						0.241167	1.30723	0.605101
						0.72788	1.49302	0.691199
						0.152539	1.71896	0.197903
						0.0743765	1.11817	0.240044
						0.250594	1.53801	0.642807
					0.95	0.634553	2.57188	1.7217
					Quartile-3	0.374814	1.70024	0.986289
					Median	0.241167	1.2752	0.728098
					Quartile-1	0.155248	1.02185	0.527674
					0.05	0.0850134	0.808001	0.25799

## Sheet: Control_siMap7d2
Control	Acetylated_normalized	Map7D1_normalized	Tubulin_normalized		siMap7d2	Acetylated_normalized	Map7D1_normalized	Tubulin_normalized
	2.10168	2.0289	2.04174			1.00313	0.700012	0.403112
	1.96861	1.72603	1.85993			0.716043	0.656078	0.329448
	1.30932	2.15565	1.34311			1.32818	0.898885	0.370385
	1.1725	1.85876	1.21185			0.368982	0.62455	0.385141
	0.584718	0.946918	0.682432			1.29363	0.671242	0.24522
	1.74961	1.8676	1.20624			0.902989	0.589367	0.259689
	2.13953	2.13049	1.84241			0.539005	0.657876	0.523224
	0.623448	1.03985	0.73155			0.656241	0.301007	0.134409
	0.582794	1.18674	0.586373			0.272528	0.401762	0.23012
	2.26438	1.68718	1.88483			1.0254	1.00468	0.260263
	0.96975	0.649366	0.542866			1.58501	0.746224	0.240684
	1.31116	1.58648	2.28453			1.1813	1.07402	1.14342
	1.2371	1.32999	1.17973			1.23506	0.795852	1.2373
	2.12336	2.32722	2.98751			2.07728	0.837869	0.941149
	0.792271	1.6328	1.6223			2.73369	1.15296	1.47201
	1.12896	1.33829	1.36641			1.72452	0.679873	1.23224
	1.3894	1.47569	1.85844			1.51434	1.2865	1.33301
	1.5403	1.14586	0.813698			0.857042	0.629286	1.16134
	1.1064	1.10439	0.735213			2.54587	0.964877	1.16708
	1.39727	2.02716	1.58761			1.64534	1.10082	0.914509
	0.935041	1.03369	1.28369			2.14646	0.739331	0.815066
	1.26412	1.27513	0.985093			2.06062	1.40854	1.37498
	1.13132	1.07367	1.42137			0.854148	0.583853	1.5637
	1.6766	1.49332	1.17343			1.55818	1.06509	1.94626
	2.13796	2.00595	0.757425			0.818548	0.504076	0.763622
	0.874541	0.545083	0.715921			2.10043	0.834093	1.36235
	1.99169	1.18339	1.4023			2.72694	0.910813	0.647069
	1.64959	1.29485	2.13798			1.70111	0.528231	0.52466
	0.886781	1.32072	0.97124			1.42542	0.624011	0.945685
	1.83336	1.46594	2.35379			2.24581	0.800587	0.811793
	0.59958	0.75873	0.979082			0.942711	0.74071	1.14652
	0.429533	1.11078	1.20475			1.17964	0.617837	1.31188
	1.16821	1.26652	1.1526			4.00803	0.975725	0.840615
	0.894912	1.05431	0.987612			0.73016	0.468473	0.660619
	0.953576	1.26419	0.984177			1.12536	0.657636	0.718206
	1.43277	0.7512	0.669781			0.512699	0.441801	0.85939
	0.30556	0.609924	0.472224			0.382924	0.463198	1.19802
	0.815964	0.798411	0.392308			2.30272	0.581335	1.0592
	1	1.55774	0.850164			1.07552	0.682925	0.69043
	1.22399	1.66154	1.06638			1.10918	0.468603	0.661375
	1.30862	1.41138	1.12998			1.19288	0.943804	0.863429
	1.0292	0.984687	0.998603			1.87302	0.672148	0.761822
	1.27951	0.846877	0.678711			1.69977	0.813879	0.791922
	0.753628	1.49194	2.02669			1.6407	0.785121	0.960397
	0.956723	1.1776	0.873692			1.02132	0.712954	0.746685
	1.3157	1.21082	1.56838			1.03115	1.07803	0.959991
	0.517923	0.572932	0.561013			1.24717	1.00943	1.13374
	0.583406	0.802833	1.1704			1.20165	0.481982	0.581052
	0.792709	1.47073	0.920233			0.418234	0.690432	0.87845
	0.916506	1.11509	0.761718			0.980042	0.384993	0.620836
	0.677653	0.992456	0.79744			0.627351	0.645206	0.708409
	0.888267	1.18244	0.844554			0.526114	0.17509	0.220729
	0.944746	1.04481	0.757539			0.492723	0.615661	0.725923
	0.748033	1.7966	1.10777			0.58404	0.786271	0.773015
	0.548435	0.692873	0.766184			0.393788	0.580365	0.462568
	0.471149	0.592055	0.686497			0.631425	0.400552	0.369834
	1.25118	0.950504	0.530444			0.406188	0.587025	0.696926
	0.789211	1.05574	1.51319			1.22202	0.794021	0.975882
	0.873667	1.30345	1.72323			1.03	0.847965	1.04635
	2.21437	2.48768	2.90891			0.75392	0.606217	0.481938
	1.74121	2.04025	1.44169			1.67674	0.619233	0.426437
	2.05386	2.67019	1.89668			0.714151	0.720522	0.659693
	1.04476	0.924215	2.30541			1.07047	0.518066	0.542253
	1.79465	0.966157	1.0566			0.996871	0.750067	0.880538
	1.0121	0.636843	1.03082			0.336483	0.690977	0.597812
	1.08952	0.571487	0.801441			0.527443	1.11726	1.27015
	1.65552	0.905327	1.05313			0.556937	0.526603	0.915915
	0.792621	0.649636	0.578536			1.52458	0.688979	0.895907
	0.543481	0.786865	1.14302			0.438428	0.442811	0.869693
	0.866251	0.667801	1.10545			0.507425	0.60543	0.417158
	0.763134	0.682646	1.13233			0.760474	0.751641	0.749933
	0.47559	0.476863	0.616862			0.476337	0.562323	0.821673
	0.856804	0.847635	0.953706			0.953382	0.848328	0.434266
	1.26344	0.936828	0.693168			0.801925	0.6802	0.570207
	0.414674	0.940328	0.961394			1.56745	0.859286	0.517895
	0.894325	0.661585	0.850519			0.513803	0.960151	0.67657
	1.14443	0.805164	0.744831			0.51336	0.659071	0.275708
	1.09241	0.632872	0.533077			0.747188	0.744799	0.334283
	1.00087	0.918531	1.69512			0.875528	0.679353	0.510994
	0.578073	0.716717	0.667148			0.268017	0.599436	0.685965
	0.590838	0.61339	0.692622			1.24948	1.78989	1.47528
	0.723203	0.605203	0.734068			1.98125	0.75824	0.734391
	0.994492	0.568928	0.693767			0.200526	0.628254	0.860704
	1.08542	0.670283	0.343764			1.92722	0.789056	1.02744
	0.703882	0.606099	0.829555			0.498923	1.29756	1.00453
	1.25066	0.655223	0.39706			0.97154	0.638789	0.672104
	0.575101	0.632753	0.445891			0.392726	0.502385	0.444068
	0.686221	0.545322	0.479609			0.428774	0.486523	0.402833
	0.483214	0.947874	0.594559			0.21514	0.231395	0.419478
	1.11322	0.533071	0.304435			1.01273	0.425496	0.431889
	0.497027	0.630362	0.572004			0.293614	0.283644	0.381433
	0.844728	0.743012	0.948856			1.30475	0.782276	0.891905
	0.810019	0.570302	0.537256			1.49464	0.609486	0.495219
	0.421927	0.41319	0.337467			2.37672	0.832102	0.977042
	0.601067	0.47313	0.599425			1.67258	0.497603	0.556636
	0.938188	0.539107	1.18299			0.752591	0.704417	0.613297
	1.3776	1.63471	0.967576			0.867202	0.415022	0.729229
	1.85408	0.655044	0.480067			1.19261	0.541738	0.853106
	0.671708	1.13947	0.736702			1.13097	0.488703	0.563189
	0.590838	0.61339	0.692622			0.805203	0.351452	0.468947
	1.07239	0.681936	1.45944			0.728943	0.713923	1.19667
	0.570817	0.504804	1.37025			0.914057	0.447534	0.618865
	0.304424	0.726697	0.979369			0.621683	0.501477	0.499743
	1.20921	0.796738	1.9067			1.47339	0.585208	0.76652
	1.07431	1.09704	0.987269			2.16442	0.819267	0.649486
	2.45069	0.886858	0.54882			1.34345	0.637699	0.758806
	0.315615	0.794885	1.34649			1.1478	0.494515	0.508732
	0.744973	1.04564	2.44676			1.28349	0.798864	0.956627
	0.722591	0.678888	1.55653			1.84184	0.883685	0.81541
	0.659731	0.707753	1.17933			1.32016	0.672148	0.976752
	0.725476	0.641597	1.02625			0.470491	0.56977	0.94787
	0.67573	0.575501	0.971354			1.52653	0.63225	0.837274
	1.8846	1.72997	1.2747			0.86428	0.73923	0.755791
	0.509355	0.561278	0.762692			1.19766	0.620263	0.452767
	1.86221	1.40206	0.674819			1.01556	0.646236	0.552112
	0.996853	1.1556	1.23354			0.444186	0.723731	0.634871
	1.07204	1.45656	1.40207			0.916714	0.965418	1.32472
	0.990296	1.22021	1.31666			0.656137	0.911414	0.646934
	1.31229	0.949786	1.55504			2.03767	1.03601	0.85502
	0.729673	1.10469	0.937522			1.66372	0.949435	0.620372
	0.575625	0.599645	1.13851			0.641523	0.702843	0.476429
	0.772775	0.785562	1.50483			0.310354	0.977587	0.630348
	0.972897	0.901619	1.75797			0.621328	0.656528	0.371516
	0.83887	0.86122	1.78305			0.797674	0.605914	0.380737
	0.94903	1.75214	1.76816			1.68286	1.54409	2.2705
	0.657807	0.62582	0.911589			0.288566	0.894522	0.62681
	0.441423	0.502294	0.824975			0.719997	1.08154	0.832402
	0.660255	0.714267	0.824518			1.61705	0.89876	0.609005
	1.19437	1.8058	1.64632			2.51135	1.50782	0.85241
	3.30216	1.55334	1.84136			1.30448	1.34357	0.810248
	1.05363	1.90806	1.94517			0.9114	0.676204	0.377605
	1.81808	1.22549	1.81759			1.74645	1.42718	0.926528
	1.0147	1.41105	1.79003			1.83059	1.2398	0.825965
	1.8023	2.08853	1.66142			1.574	1.22521	0.726909
	1.49969	2.12012	1.85325			1.12999	1.33848	0.893935
	2.23038	1.61814	1.00276			1.2462	1.64211	0.979013
	1.19788	1.53422	1.16248			0.440534	0.690842	0.89493
	3.19448	1.83631	0.891945			0.631338	0.746164	0.963082
	1.40876	0.975186	0.426135			0.374156	0.391033	0.468737
	1.62578	1.20409	0.6566			2.01309	1.01343	1.36367
	1.14719	1.18605	1.23012			0.882646	0.521398	0.737153
	0.942185	0.993946	0.522765			1.02408	0.757432	0.633921
	0.963843	0.699293	0.537521			0.596702	0.65368	0.871218
	1.81536	1.08289	1.24068			0.288662	0.49011	0.509732
	2.31412	1.22429	0.507148			1.46716	0.381743	0.331687
	2.45591	1.18551	1.13889			1.83711	0.758631	0.898547
	1.34414	1.30101	0.994316			0.667991	0.444138	0.860826
	1.66551	0.978363	0.543262			0.742612	0.947914	0.775105
	2.3826	2.07606	1.65333			0.93894	0.819228	1.2191
	0.660713	1.70834	2.06379			0.910705	0.495205	0.903887
	0.561628	1.27445	1.40478			0.873702	0.90398	0.865591
	1.31853	1.62743	3.53287			1.27188	0.527152	0.787449
	2.18531	2.41057	3.5157			0.466138	0.67304	0.581099
	0.581357	1.2126	1.17357			1.70567	0.40428	0.614515
	1.29135	1.18964	2.77809			0.727354	0.473328	0.617098
	0.77979	0.929633	1.17747			1.25557	0.895768	0.962623
	0.599947	0.670523	0.525923			1.10318	0.903321	1.14405
	0.824423	0.841405	1.61136			0.903252	0.723388	0.777459
	0.807587	0.762227	0.995464			1.33449	0.804963	0.451972
	0.976996	0.979741	1.45427			1.27907	0.91303	0.775622
	0.945604	0.869696	0.893437			0.728845	0.73993	0.738072
	0.790664	1.0196	1.30585			0.68818	0.339271	0.32401
	0.684388	0.492388	0.514497			0.524942	0.320805	0.400489
	0.644053	0.684848	0.503761			0.739297	0.434499	0.760398
	2.92766	0.870954	0.621634			1.19476	0.748062	0.510728
	0.442288	0.732798	0.435494			2.89512	1.04974	0.884048
	0.482185	0.823424	0.48533			1.65437	0.670577	0.604145
	0.355479	1.22213	0.425044			1.18567	0.963743	0.956423
	0.369684	1.0223	0.39938			1.44231	0.563762	0.636864
	1.28346	1.01145	1.04145			0.974311	0.562978	0.508416
	0.400023	1.11586	0.854165			0.342722	0.454172	0.621834
	2.26764	1.75575	1.28392			1.68977	0.516088	1.09267
	0.574693	1.23759	1.27226			1.28154	0.98058	0.689584
	2.72396	1.15955	0.926738			1.66885	0.947751	0.907691
	0.449302	0.594462	0.672504			1.04741	0.530692	0.705365
	2.23906	2.34278	3.34851			1.37892	0.831824	0.578594
	0.669219	0.972429	1.77815			1.91861	0.735812	0.983014
	1.87797	0.902841	1.95413			0.821667	0.645714	1.10632
	0.892379	0.526732	0.84739			1.47621	0.590315	1.08614
	1.66331	0.723028	1.05449			0.884967	0.536606	0.765369
	1.79581	1	0.98846			0.59195	0.504381	0.827107
	1.89279	1.20247	1.35494			0.456962	0.559598	0.778896
	1.39219	1.21056	0.965034			0.483624	0.589712	0.659755
	3.75944	1.74065	0.984268			0.633708	0.641127	0.651778
	2.53289	1.91603	1.46897			2.39102	0.941354	0.520382
	1.60912	0.905898	0.703393			0.548955	0.59122	0.747044
	2.38769	1.81671	3.09227			0.733205	0.514459	0.79699
	1.77792	0.939223	1.52943			1.33946	0.606367	0.918038
	1.56782	0.977763	0.909227			1.40938	0.652412	0.705365
	1.62105	1.51343	1.00844			0.866339	0.38767	0.45373
	0.609768	0.536982	0.718608			1.66744	1.38853	1.07088
	1.81562	0.949293	1.18419			1.56193	0.607031	1.00481
	0.456054	0.478183	0.516909		0.95	2.20105	1.29148	1.31766
	1.51135	1.0214	1.18011		Quartile-3	1.49957	0.851068	0.916446
	0.925787	1.23106	0.855371		Median	1.01844	0.677778	0.748489
	1.66016	0.900623	1.22243		Quartile-1	0.652483	0.561642	0.549648
	1.75591	0.652901	1		0.05	0.357165	0.38952	0.33068
0.95	2.32781	2.04741	2.2887
Quartile-3	1.56782	1.32999	1.42137
Median	1	1	1
Quartile-1	0.686221	0.714267	0.718608
0.05	0.442115	0.538682	0.466958
